# Supplementary material for: A high-throughput multi-microfluidic crystal generator (MMicroCryGen) platform for facile screening of polymorphism and crystal morphology for pharmaceutical compounds
Source: Royal Society of Chemistry journal article supplement (doi:10.1039/c8lc00301g), 2018-01-01
Supplement: c8lc00301g1.pdf [file c8lc00301g1.pdf]

### Supporting information

Technical drawings of the MMicroCryGen platform: (a) main aluminium plate (b), plastic cover and (c) lateral edge.

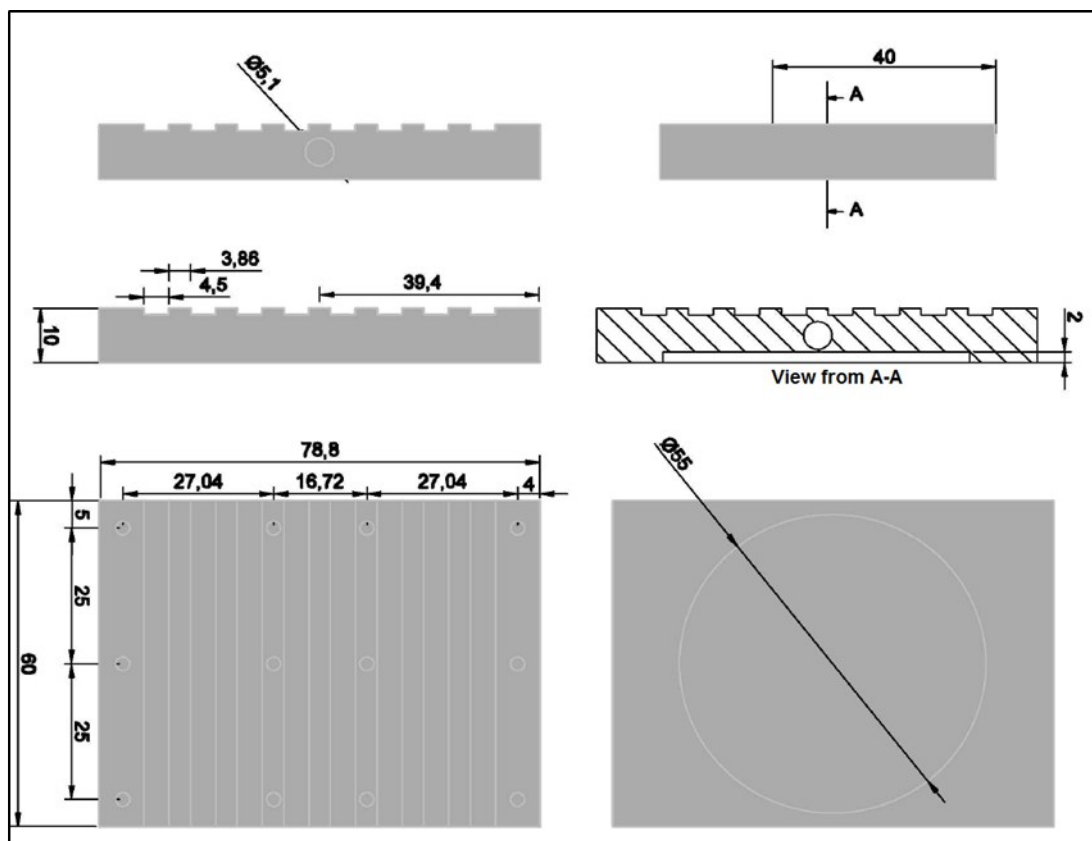

(a)

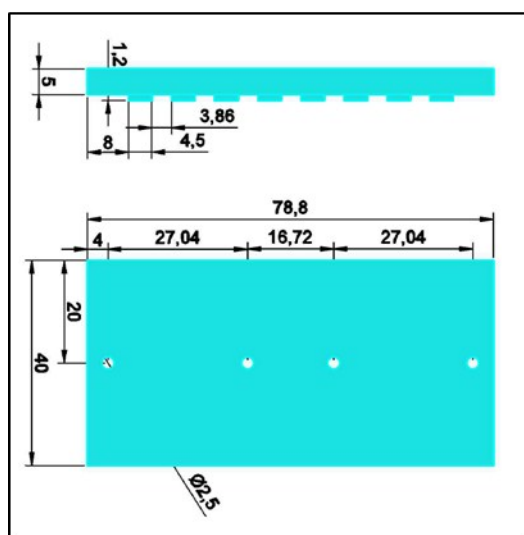

(b)

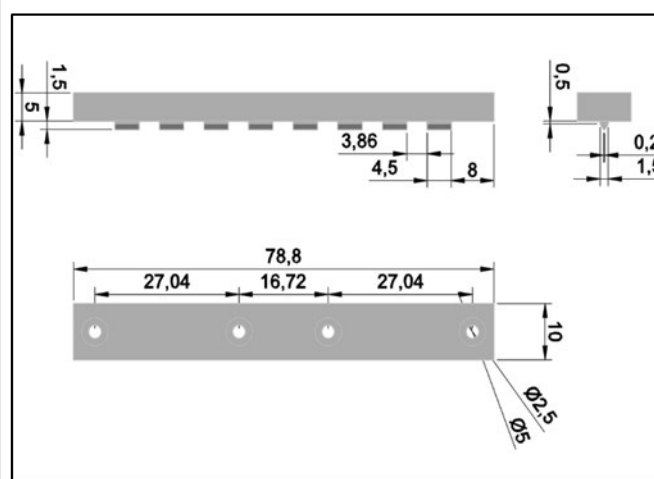

(c)
